# Supplementary material for: Three-dimensional plasmonic nanoclusters driven by co-assembly of thermo-plasmonic nanoparticles and colloidal quantum dots
Source: Royal Society of Chemistry journal article supplement (doi:10.1039/d2nr03737h), 2022-01-01
Supplement: d2nr03737h1.pdf [file d2nr03737h1.pdf]

## Electronic Supplementary Information

# Three-dimensional plasmonic nanoclusters driven by co-assembly of thermo-plasmonic nanoparticles and colloidal quantum dots

*Won-Geun Kim<sup>1,2,†</sup>, Vasanthan Devaraj<sup>1,†</sup>, Younghwan Yang<sup>2</sup>, Jong-Min Lee<sup>3</sup>, Ji Tae Kim<sup>4,\*</sup>, Jin-Woo Oh<sup>1,5,6,\*</sup> and Junsuk Rho<sup>2,7,8,\*</sup>*

<sup>1</sup>BIT Fusion Technology Center, Pusan National University, Busan 46241, Republic of Korea

<sup>2</sup>Department of Mechanical Engineering, Pohang University of Science and Technology (POSTECH), Pohang, 37673, Republic of Korea

<sup>3</sup>Center of Nano Convergence Technology and School of Nanoconvergence Technology, Hallym University, Chuncheon 24252, Korea

<sup>4</sup>Department of Mechanical Engineering, The University of Hong Kong, Hong Kong, China

<sup>5</sup>Department of Nano Fusion Technology, Pusan National University, Busan 46241, Republic of Korea

<sup>6</sup>Department of Nanoenergy Engineering, Pusan National University, Busan 46241, Republic of Korea

<sup>7</sup>Department of Chemical Engineering, Pohang University of Science and Technology (POSTECH), Pohang, 37673, Republic of Korea

<sup>8</sup>POSCO-POSTECH-RIST Convergence Research Center for Flat Optics and Metaphotonics, Pohang, 37673, Republic of Korea.

**KEYWORDS:** Plasmonic clusters; Self-assembly; 3D structures; Plasmonic heating; Quantum dots

### Corresponding Author

\*E-mail : [jtkim@hku.hk](mailto:jtkim@hku.hk), [ojw@pusan.ac.kr](mailto:ojw@pusan.ac.kr) and [jsrho@postech.ac.kr](mailto:jsrho@postech.ac.kr)

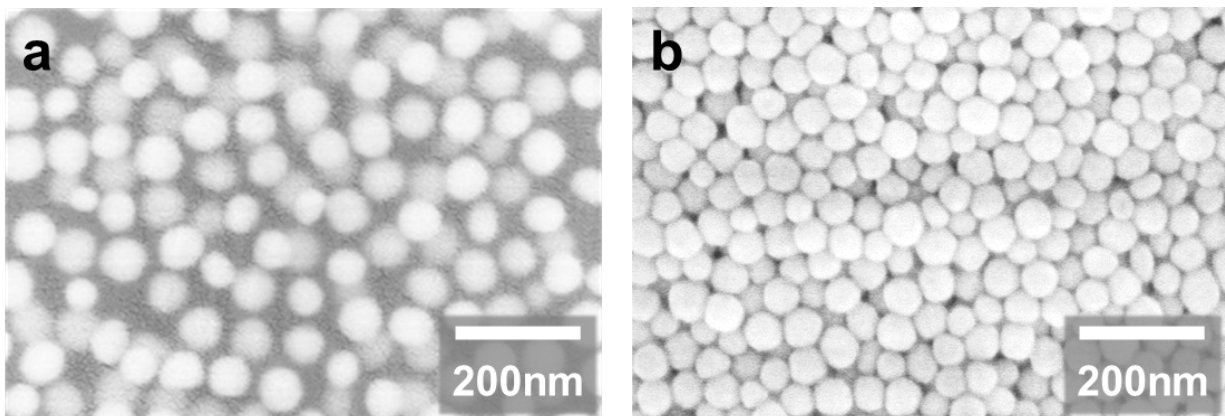

**Figure S1.** The nanostructures of the pillar fabricated by (a) 50 kDa PS-coated AuNP and (b) 40 kDa PVP-coated AuNP.

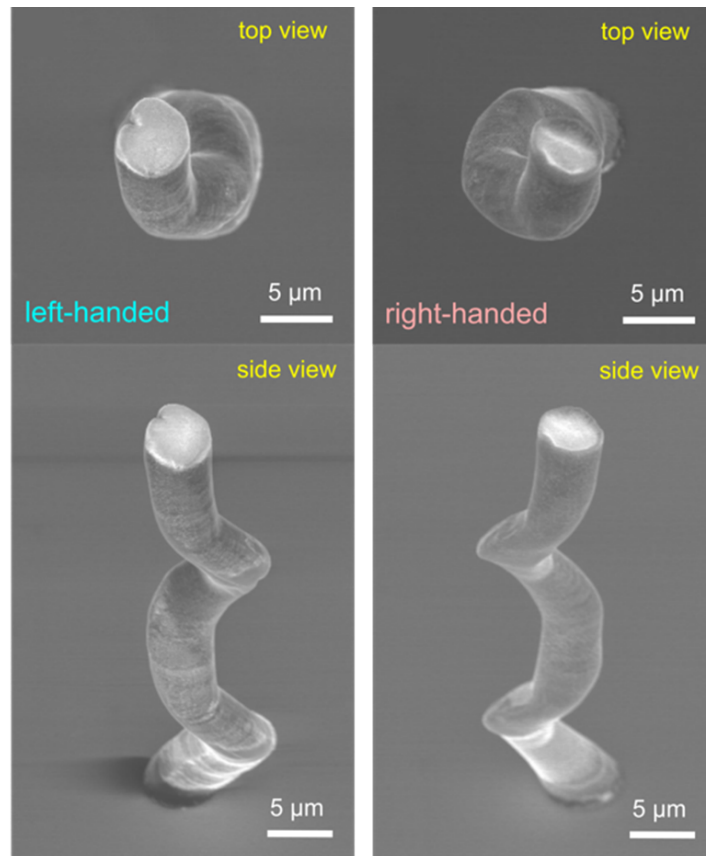

**Figure S2.** The left-handed and right-handed coil structures fabricated by adjusting the pulling direction of the micropipette.

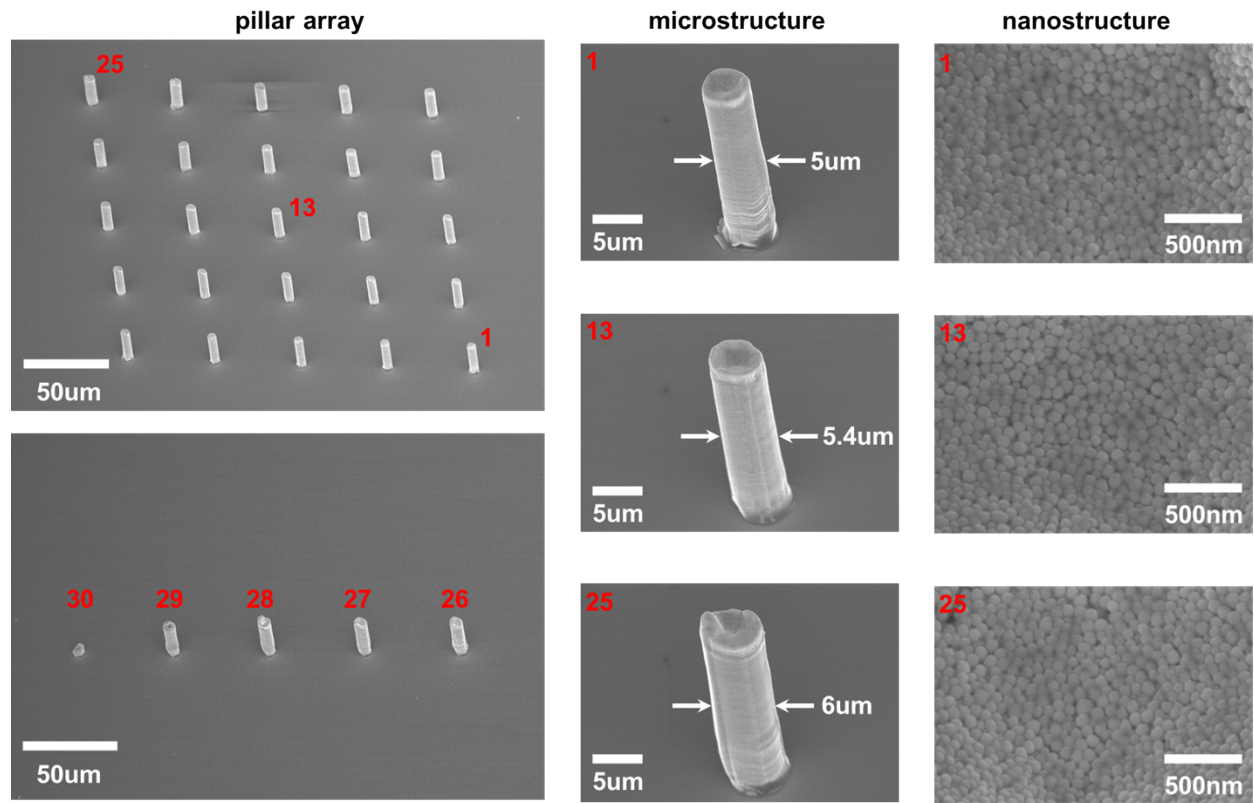

**Figure S3.** Fabrication of the pillar array and micro/nanostructures of the fabricated pillars

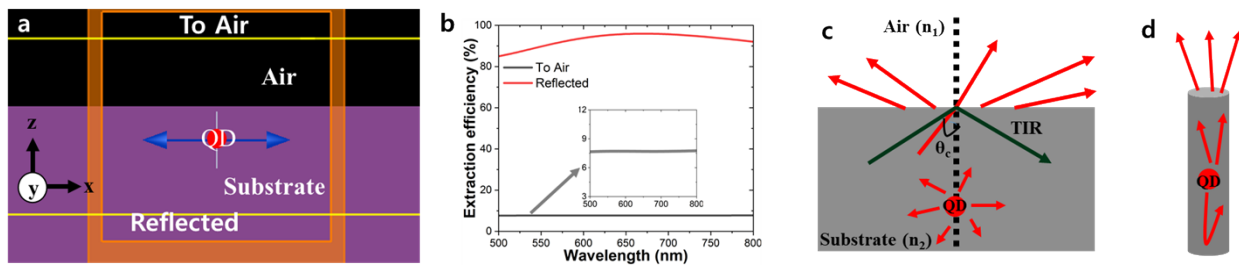

**Figure S4.** (a) Three-dimensional model of a QD in a dielectric medium surrounded by PML boundary conditions in XYZ directions. (b) Photon extraction efficiency property of a QD in dielectric medium for the monitors recorded at air and within the substrate. Schematic models to explain the optical properties for a QD embedded in a dielectric medium (c) and a free-standing pillar (d).
